# Supplementary material
Source: HighWire-hosted journal article supplement (https://gut.bmj.com/content/gutjnl-2019-319826)
Supplement: inline-supplementary-material-5 [file inline-supplementary-material-5.xls]

## Sheet: S. Table 4
S. Table 4: SparCC co-occurence among top bacteria genera post placebo
Bacteria genus 1	Bacteria genus 2	Correlation coefficient	P values	FDR adjust P values
Helicobacter	Achromobacter	-0.2721	0.00032	0.0404153
Prevotella	Acinetobacter	0.299536	0.00032	0.0404153
f_Ruminicoccaceae	Acinetobacter	0.410092	2.76308e-07	5.60867e-05
Ruminococcus	Acinetobacter	0.344101	2.76308e-07	5.60867e-05
Clostridium	Bacillus	-0.33649	2.76308e-07	5.60867e-05
Faecalibacterium	Bacillus	-0.352393	2.76308e-07	5.60867e-05
f_Lachnospiraceae	Bacillus	-0.34996	2.76308e-07	5.60867e-05
Oscillospira	Bacillus	-0.27942	2.76308e-07	5.60867e-05
f_Lachnospiraceae	Bacteroides	0.341899	2.76308e-07	5.60867e-05
Prevotella	Bacteroides	0.293308	2.76308e-07	5.60867e-05
Enterobacteriacea	Bifidobacterium	0.470041	2.76308e-07	5.60867e-05
S24-7_unclassified	Bifidobacterium	0.364127	0.00032	0.0404153
Bacillus	Blautia	-0.318482	2.76308e-07	5.60867e-05
Clostridium	Blautia	0.397795	2.76308e-07	5.60867e-05
Clostridium	Blautia	0.417248	2.76308e-07	5.60867e-05
Coprococcus	Blautia	0.291992	0.00032	0.0404153
Faecalibacterium	Blautia	0.480858	2.76308e-07	5.60867e-05
f_Lachnospiraceae	Blautia	0.416395	2.76308e-07	5.60867e-05
Roseburia	Blautia	0.441152	2.76308e-07	5.60867e-05
Halomonas	Brucellaceae	0.358467	2.76308e-07	5.60867e-05
Vibrio	Brucellaceae	0.349949	2.76308e-07	5.60867e-05
Cryocola	Cellulomonas	0.394936	2.76308e-07	5.60867e-05
f_Lachnospiraceae	o_Clostridiales	0.351514	2.76308e-07	5.60867e-05
Oscillospira	o_Clostridiales	0.363668	2.76308e-07	5.60867e-05
Prevotella	o_Clostridiales	0.314955	2.76308e-07	5.60867e-05
f_Ruminicoccaceae	o_Clostridiales	0.451961	2.76308e-07	5.60867e-05
Acinetobacter	Clostridium	0.309709	2.76308e-07	5.60867e-05
Bacteroides	Clostridium	0.29933	2.76308e-07	5.60867e-05
o_Clostridiales	Clostridium	0.329293	2.76308e-07	5.60867e-05
Clostridium	Clostridium	0.376215	2.76308e-07	5.60867e-05
Coprococcus	Clostridium	0.288474	2.76308e-07	5.60867e-05
Coprococcus	Clostridium	0.315545	2.76308e-07	5.60867e-05
Faecalibacterium	Clostridium	0.378042	2.76308e-07	5.60867e-05
Faecalibacterium	Clostridium	0.430162	2.76308e-07	5.60867e-05
f_Lachnospiraceae	Clostridium	0.373842	2.76308e-07	5.60867e-05
f_Lachnospiraceae	Clostridium	0.528804	2.76308e-07	5.60867e-05
Oscillospira	Clostridium	0.339421	2.76308e-07	5.60867e-05
Oscillospira	Clostridium	0.434635	2.76308e-07	5.60867e-05
Prevotella	Clostridium	0.348611	2.76308e-07	5.60867e-05
f_Ruminicoccaceae	Clostridium	0.375255	2.76308e-07	5.60867e-05
f_Ruminicoccaceae	Clostridium	0.445333	2.76308e-07	5.60867e-05
o_Clostridiales	Coprococcus	0.336914	2.76308e-07	5.60867e-05
Faecalibacterium	Coprococcus	0.51758	2.76308e-07	5.60867e-05
f_Lachnospiraceae	Coprococcus	0.438094	2.76308e-07	5.60867e-05
Oscillospira	Coprococcus	0.442237	2.76308e-07	5.60867e-05
Prevotella	Coprococcus	0.438699	2.76308e-07	5.60867e-05
f_Ruminicoccaceae	Coprococcus	0.422381	2.76308e-07	5.60867e-05
Ruminococcus	Coprococcus	0.345753	2.76308e-07	5.60867e-05
o_Clostridiales	Cryocola	-0.293105	2.76308e-07	5.60867e-05
Pseudomonas	Cryocola	0.837019	2.76308e-07	5.60867e-05
Halomonas	Delftia	0.273123	0.00032	0.0404153
f_Lachnospiraceae	Delftia	0.303568	2.76308e-07	5.60867e-05
Sphingomonas	Delftia	0.280272	2.76308e-07	5.60867e-05
Stenotrophomonas	Delftia	0.468856	2.76308e-07	5.60867e-05
Bacteroidetes	f_Enterobacteriacea	-0.324007	0.00032	0.0404153
Bifidobacterium	f_Enterobacteriacea	0.355119	2.76308e-07	5.60867e-05
Cryocola	f_Enterobacteriacea	0.529076	2.76308e-07	5.60867e-05
Pseudomonas	f_Enterobacteriacea	0.587871	2.76308e-07	5.60867e-05
Lactobacillus	Escherichia	0.320518	2.76308e-07	5.60867e-05
Pseudomonas	Escherichia	0.31842	0.00032	0.0404153
Stenotrophomonas	Escherichia	0.346824	2.76308e-07	5.60867e-05
Veillonella	Escherichia	0.415418	2.76308e-07	5.60867e-05
o_Clostridiales	Faecalibacterium	0.343195	2.76308e-07	5.60867e-05
f_Lachnospiraceae	Faecalibacterium	0.579712	2.76308e-07	5.60867e-05
Oscillospira	Faecalibacterium	0.484874	2.76308e-07	5.60867e-05
Prevotella	Faecalibacterium	0.423023	2.76308e-07	5.60867e-05
f_Ruminicoccaceae	Faecalibacterium	0.437511	2.76308e-07	5.60867e-05
Ruminococcus	Faecalibacterium	0.490493	2.76308e-07	5.60867e-05
Oscillospira	c_Gammaproteobacteria	0.276831	2.76308e-07	5.60867e-05
Lactobacillus	Gemella	0.344861	2.76308e-07	5.60867e-05
Neisseria	Gemella	0.308369	0.00032	0.0404153
Rothia	Gemella	0.347564	2.76308e-07	5.60867e-05
Streptococcus	Gemella	0.451076	2.76308e-07	5.60867e-05
Actinomyces	Granulicatella	0.349394	2.76308e-07	5.60867e-05
Gemella	Granulicatella	0.368474	2.76308e-07	5.60867e-05
Neisseria	Granulicatella	0.376246	2.76308e-07	5.60867e-05
Streptococcus	Granulicatella	0.400493	2.76308e-07	5.60867e-05
Acinetobacter	Haemophilus	0.307282	2.76308e-07	5.60867e-05
Bacteroides	Haemophilus	0.276156	0.00032	0.0404153
Prevotella	Haemophilus	0.328528	2.76308e-07	5.60867e-05
f_Ruminicoccaceae	Haemophilus	0.257715	0.00032	0.0404153
Streptococcus	Haemophilus	0.329307	2.76308e-07	5.60867e-05
Cryocola	Halomonas	0.610162	2.76308e-07	5.60867e-05
f_Enterobacteriacea	Halomonas	0.533515	2.76308e-07	5.60867e-05
Pseudomonas	Halomonas	0.663938	2.76308e-07	5.60867e-05
Stenotrophomonas	Halomonas	0.399237	2.76308e-07	5.60867e-05
Achromobacter	Helicobacter	-0.2721	0.00032	0.0404153
Methylobacterium	Helicobacter	-0.366338	2.76308e-07	5.60867e-05
Microbacterium	Helicobacter	-0.334786	0.00032	0.0404153
Acinetobacter	Lactobacillus	0.365414	2.76308e-07	5.60867e-05
Bacteroides	Lactobacillus	0.28413	0.00032	0.0404153
Helicobacter	Methylobacterium	-0.366338	2.76308e-07	5.60867e-05
Helicobacter	Microbacterium	-0.334786	0.00032	0.0404153
o_Clostridiales	f_Mogibacteraceae	0.286292	2.76308e-07	5.60867e-05
Helicobacter	f_Mogibacteraceae	-0.361065	2.76308e-07	5.60867e-05
f_Lachnospiraceae	f_Mogibacteraceae	0.302857	2.76308e-07	5.60867e-05
Prevotella	f_Mogibacteraceae	0.265709	0.00032	0.0404153
Acinetobacter	Moraxella	0.365783	2.76308e-07	5.60867e-05
Haemophilus	Moraxella	0.241952	2.76308e-07	5.60867e-05
Ruminococcus	Moraxella	0.326241	2.76308e-07	5.60867e-05
Actinomyces	Neisseria	0.343327	2.76308e-07	5.60867e-05
Streptococcus	Neisseria	0.290193	2.76308e-07	5.60867e-05
f_Lachnospiraceae	Oscillospira	0.606922	2.76308e-07	5.60867e-05
Prevotella	Oscillospira	0.46315	2.76308e-07	5.60867e-05
Bacillus	Parvimonas	-0.280524	0.00032	0.0404153
o_Clostridiales	Parvimonas	0.42858	2.76308e-07	5.60867e-05
Clostridium	Parvimonas	0.323776	2.76308e-07	5.60867e-05
Coprococcus	Parvimonas	0.265166	2.76308e-07	5.60867e-05
Faecalibacterium	Parvimonas	0.401338	2.76308e-07	5.60867e-05
f_Lachnospiraceae	Parvimonas	0.315189	2.76308e-07	5.60867e-05
Prevotella	Parvimonas	0.314307	2.76308e-07	5.60867e-05
Roseburia	Parvimonas	0.354906	2.76308e-07	5.60867e-05
SMB53	Parvimonas	0.286322	2.76308e-07	5.60867e-05
Parvimonas	Peptostreptococcus	0.344531	2.76308e-07	5.60867e-05
Prevotella	Peptostreptococcus	0.260642	2.76308e-07	5.60867e-05
Pseudomonas	Peptostreptococcus	0.335293	2.76308e-07	5.60867e-05
Bacteroides	Prevotella	0.408351	2.76308e-07	5.60867e-05
Coprococcus	Prevotella	0.290485	2.76308e-07	5.60867e-05
f_Lachnospiraceae	Prevotella	0.362135	2.76308e-07	5.60867e-05
f_Lachnospiraceae	Prevotella	0.46579	2.76308e-07	5.60867e-05
Oscillospira	Prevotella	0.282471	2.76308e-07	5.60867e-05
Prevotella	Prevotella	0.443995	2.76308e-07	5.60867e-05
Cryocola	Propionibacterium	0.271981	0.00032	0.0404153
Halomonas	Propionibacterium	0.305142	2.76308e-07	5.60867e-05
Pseudomonas	Propionibacterium	0.320888	2.76308e-07	5.60867e-05
Vibrio	Propionibacterium	0.306842	2.76308e-07	5.60867e-05
Bacillus	Proteus	0.547855	2.76308e-07	5.60867e-05
Clostridium	Roseburia	0.357719	2.76308e-07	5.60867e-05
Clostridium	Roseburia	0.400316	2.76308e-07	5.60867e-05
Coprococcus	Roseburia	0.419814	2.76308e-07	5.60867e-05
Faecalibacterium	Roseburia	0.567208	2.76308e-07	5.60867e-05
f_Lachnospiraceae	Roseburia	0.406988	2.76308e-07	5.60867e-05
Oscillospira	Roseburia	0.384437	2.76308e-07	5.60867e-05
Prevotella	Roseburia	0.289927	0.00032	0.0404153
f_Ruminicoccaceae	Roseburia	0.286912	0.00032	0.0404153
Ruminococcus	Roseburia	0.462005	2.76308e-07	5.60867e-05
Lactobacillus	Rothia	0.274848	0.00032	0.0404153
Streptococcus	Rothia	0.32587	2.76308e-07	5.60867e-05
f_Lachnospiraceae	f_Ruminicoccaceae	0.475778	2.76308e-07	5.60867e-05
Oscillospira	f_Ruminicoccaceae	0.486835	2.76308e-07	5.60867e-05
Prevotella	f_Ruminicoccaceae	0.493877	2.76308e-07	5.60867e-05
o_Clostridiales	Ruminococcus	0.333592	0.00032	0.0404153
f_Lachnospiraceae	Ruminococcus	0.36681	2.76308e-07	5.60867e-05
Oscillospira	Ruminococcus	0.42083	2.76308e-07	5.60867e-05
Prevotella	Ruminococcus	0.38973	2.76308e-07	5.60867e-05
f_Ruminicoccaceae	Ruminococcus	0.438197	2.76308e-07	5.60867e-05
Bacteroides	S24-7_unclassified	0.321573	0.00032	0.0404153
f_Enterobacteriacea	S24-7_unclassified	0.299156	0.00032	0.0404153
Blautia	SMB53	0.421144	2.76308e-07	5.60867e-05
Clostridium	SMB53	0.435212	2.76308e-07	5.60867e-05
Clostridium	SMB53	0.448155	2.76308e-07	5.60867e-05
Coprococcus	SMB53	0.337228	2.76308e-07	5.60867e-05
Faecalibacterium	SMB53	0.48548	2.76308e-07	5.60867e-05
f_Lachnospiraceae	SMB53	0.423754	2.76308e-07	5.60867e-05
Moraxella	SMB53	0.280482	0.00032	0.0404153
Oscillospira	SMB53	0.362855	2.76308e-07	5.60867e-05
Prevotella	SMB53	0.327568	2.76308e-07	5.60867e-05
Roseburia	SMB53	0.419955	2.76308e-07	5.60867e-05
f_Ruminicoccaceae	SMB53	0.404461	2.76308e-07	5.60867e-05
Ruminococcus	SMB53	0.387709	2.76308e-07	5.60867e-05
Corynebacterium	Staphylococcus	0.263112	2.76308e-07	5.60867e-05
Bacteroides	Stenotrophomonas	0.319944	2.76308e-07	5.60867e-05
f_Enterobacteriacea	Stenotrophomonas	0.279626	0.00032	0.0404153
Prevotella	Stenotrophomonas	0.289227	0.00032	0.0404153
Pseudomonas	Stenotrophomonas	0.369318	2.76308e-07	5.60867e-05
Sphingomonas	Stenotrophomonas	0.432377	2.76308e-07	5.60867e-05
Actinomyces	Streptococcus	0.283909	0.00032	0.0404153
Bifidobacterium	Veillonella	0.443712	2.76308e-07	5.60867e-05
Lactobacillus	Veillonella	0.345725	2.76308e-07	5.60867e-05
Actinomyces	Vibrio	0.286244	2.76308e-07	5.60867e-05
Cryocola	Vibrio	0.652149	2.76308e-07	5.60867e-05
f_Enterobacteriacea	Vibrio	0.541451	2.76308e-07	5.60867e-05
Gemella	Vibrio	0.3533	2.76308e-07	5.60867e-05
Halomonas	Vibrio	0.702068	2.76308e-07	5.60867e-05
Neisseria	Vibrio	0.348364	2.76308e-07	5.60867e-05
Pseudomonas	Vibrio	0.717301	2.76308e-07	5.60867e-05
Stenotrophomonas	Vibrio	0.362776	2.76308e-07	5.60867e-05
